# Supplementary material
Source: MDPI journal article supplement (https://www.mdpi.com/2673-6772/1/2/9)
Supplement: s1 [file s1]

## Supplementary Information

Environmental correlates of prevalence of an intraerythrocytic apicomplexan infecting Caribbean damselfish

Akacia K. Halliday-Isaac<sup>1</sup>, Jennilee B. Robinson<sup>2</sup>, Edwin Cruz-Rivera<sup>1,2</sup>, Andrew G. Campbell<sup>3</sup>  
Paul C. Sikkel<sup>4,5</sup>

<sup>1</sup> Master of Marine and Environmental Science Program, University of the Virgin Islands, St. Thomas, US Virgin Islands, United States

<sup>2</sup> Department of Biological Sciences, College of Science and Mathematics, University of the Virgin Islands, St. Thomas, US Virgin Islands, United States

<sup>3</sup> Department of Molecular Microbiology & Immunology, Brown University, Providence, RI, United States

<sup>4</sup> Department of Biology and Environmental Sciences Program, Arkansas State University, State University, AR, United States

<sup>5</sup> Water Research Group, Unit for Environmental Sciences and Management, North-West University, Potchefstroom, 2520 South Africa

Corresponding Author: Paul C. Sikkel

Email address: [psikkel@astate.edu](mailto:psikkel@astate.edu)

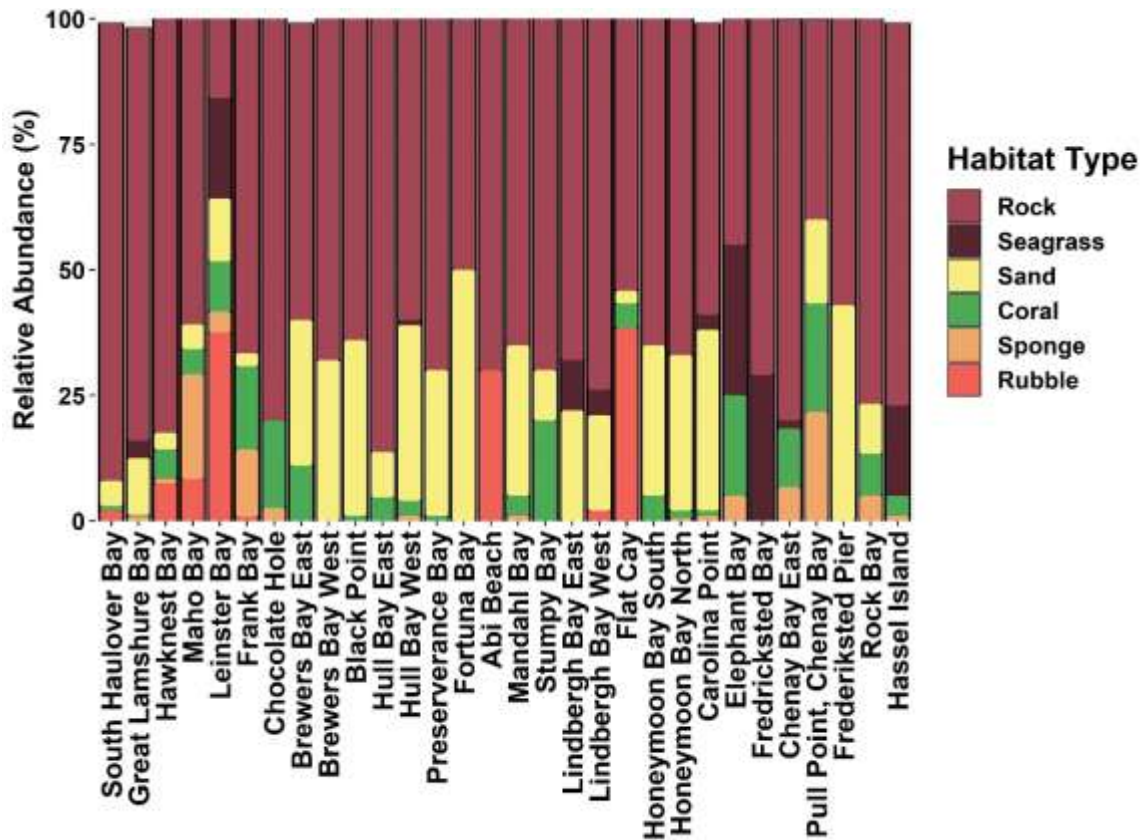

Figure S1: Habitat composition of each of 30 sampled sites in the US Virgin Islands from which *Stegastes adustus* were collected.

Table S1. Model selection table

| (Intercept) | Avg.<br>Meridional<br>Velocity | Avg.<br>Zonal<br>Velocity | Habitat<br>Complex-<br>ity | Dist.<br>Water-<br>shed | Population<br>Density | All<br><i>Stegast.</i><br>Pop.Dens. | Avg.Merid.<br>Vel.:Avg.<br>Zonal.Vel. | Avg.Merid.<br>Vel.: Near<br>Dist | Habitat<br>Comp.:<br>Pop.Dens. | Pop.Dens:<br>All<br><i>Stegast.</i><br>Pop.Dens. | df | logLik   | AIC      | delta    | weight   |
|-------------|--------------------------------|---------------------------|----------------------------|-------------------------|-----------------------|-------------------------------------|---------------------------------------|----------------------------------|--------------------------------|--------------------------------------------------|----|----------|----------|----------|----------|
| -0.09472    | 3.183447                       | NA                        | NA                         | NA                      | 0.015275              | NA                                  | NA                                    | NA                               | NA                             | NA                                               | 4  | 2.638648 | 4.322703 | 0        | 0.131785 |
| -0.02766    | 3.363464                       | NA                        | NA                         | -8.11564                | 0.013758              | NA                                  | NA                                    | NA                               | NA                             | NA                                               | 5  | 3.773672 | 4.952656 | 0.629952 | 0.096177 |
| 0.066342    | 3.045737                       | NA                        | NA                         | -9.41798                | 0.018666              | -0.00571                            | NA                                    | NA                               | NA                             | NA                                               | 6  | 5.016211 | 5.619752 | 1.297049 | 0.068899 |
| -0.02643    | 2.899071                       | NA                        | NA                         | NA                      | 0.019501              | -0.00469                            | NA                                    | NA                               | NA                             | NA                                               | 5  | 3.421875 | 5.656251 | 1.333548 | 0.067653 |
| 0.18569     | 3.423485                       | NA                        | NA                         | -10.0063                | NA                    | NA                                  | NA                                    | NA                               | NA                             | NA                                               | 4  | 1.468633 | 6.662734 | 2.340031 | 0.040901 |
| -0.03954    | 3.261121                       | 0.631369                  | NA                         | NA                      | 0.014189              | NA                                  | NA                                    | NA                               | NA                             | NA                                               | 5  | 2.759146 | 6.981707 | 2.659004 | 0.034871 |
| 0.130587    | 3.204053                       | NA                        | NA                         | NA                      | NA                    | NA                                  | NA                                    | NA                               | NA                             | NA                                               | 3  | -0.03142 | 6.985925 | 2.663222 | 0.034798 |
| -0.03132    | 3.100339                       | NA                        | -0.07178                   | NA                      | 0.015209              | NA                                  | NA                                    | NA                               | NA                             | NA                                               | 5  | 2.733786 | 7.032427 | 2.709724 | 0.033998 |
| 0.003833    | 2.571803                       | NA                        | NA                         | -14.4552                | 0.014485              | NA                                  | NA                                    | 108.906                          | NA                             | NA                                               | 6  | 4.032856 | 7.586462 | 3.263758 | 0.025772 |
| 0.06244     | 3.256877                       | NA                        | -0.09874                   | -8.46444                | 0.013603              | NA                                  | NA                                    | NA                               | NA                             | NA                                               | 6  | 3.966292 | 7.719589 | 3.396886 | 0.024112 |
| 0.088229    | 2.984562                       | 1.155908                  | NA                         | NA                      | 0.018356              | -0.00562                            | NA                                    | NA                               | NA                             | NA                                               | 6  | 3.818936 | 8.014301 | 3.691598 | 0.020809 |
| -0.04526    | 3.343473                       | -0.24405                  | NA                         | -8.56797                | 0.014094              | NA                                  | NA                                    | NA                               | NA                             | NA                                               | 6  | 3.789359 | 8.073455 | 3.750752 | 0.020202 |
| 0.558935    | 2.9883                         | NA                        | -0.90395                   | NA                      | -0.02113              | NA                                  | NA                                    | NA                               | 0.052532                       | NA                                               | 6  | 3.783466 | 8.085242 | 3.762539 | 0.020084 |
| 0.225844    | 3.389381                       | 1.535384                  | NA                         | NA                      | NA                    | NA                                  | NA                                    | NA                               | NA                             | NA                                               | 4  | 0.650985 | 8.298029 | 3.975326 | 0.018057 |
| 0.0947      | 2.307025                       | NA                        | NA                         | -15.3492                | 0.019286              | -0.00564                            | NA                                    | 102.1753                         | NA                             | NA                                               | 7  | 5.263746 | 8.563417 | 4.240714 | 0.015813 |
| 0.538064    | -8.23252                       | 8.621775                  | NA                         | NA                      | 0.013526              | NA                                  | -155.229                              | NA                               | NA                             | NA                                               | 6  | 3.494053 | 8.664069 | 4.341366 | 0.015037 |
| 0.021323    | 2.840769                       | NA                        | -0.05576                   | NA                      | 0.019357              | -0.00458                            | NA                                    | NA                               | NA                             | NA                                               | 6  | 3.481912 | 8.68835  | 4.365647 | 0.014855 |
| 0.02918     | 2.921879                       | NA                        | NA                         | NA                      | 0.015583              | -0.00658                            | NA                                    | NA                               | NA                             | 0.000119                                         | 6  | 3.452615 | 8.746943 | 4.42424  | 0.014426 |
| 0.140114    | 2.962985                       | NA                        | -0.0831                    | -9.68304                | 0.018428              | -0.00559                            | NA                                    | NA                               | NA                             | NA                                               | 7  | 5.163576 | 8.763757 | 4.441054 | 0.014305 |
| 0.690244    | -11.2988                       | 9.764062                  | NA                         | -10.361                 | 0.013228              | NA                                  | -197.985                              | NA                               | NA                             | NA                                               | 7  | 5.043281 | 9.004346 | 4.681643 | 0.012684 |
| 0.112668    | 3.064437                       | NA                        | NA                         | -9.3919                 | 0.015386              | -0.0073                             | NA                                    | NA                               | NA                             | 9.94E-05                                         | 7  | 5.040182 | 9.010545 | 4.687842 | 0.012645 |
| 0.088039    | 3.058203                       | 0.263519                  | NA                         | -8.96694                | 0.018445              | -0.00588                            | NA                                    | NA                               | NA                             | NA                                               | 7  | 5.035014 | 9.02088  | 4.698177 | 0.01258  |
| 0.286133    | 3.30061                        | NA                        | -0.11311                   | -10.3813                | NA                    | NA                                  | NA                                    | NA                               | NA                             | NA                                               | 5  | 1.685925 | 9.128149 | 4.805446 | 0.011923 |
| 0.218222    | 3.472108                       | 0.640453                  | NA                         | -8.69839                | NA                    | NA                                  | NA                                    | NA                               | NA                             | NA                                               | 5  | 1.570308 | 9.359384 | 5.036681 | 0.010621 |
| 0.219918    | 3.363859                       | NA                        | NA                         | -10.4041                | NA                    | -0.00115                            | NA                                    | NA                               | NA                             | NA                                               | 5  | 1.521138 | 9.457724 | 5.135021 | 0.010111 |
| 0.201275    | 3.109854                       | NA                        | -0.08127                   | NA                      | NA                    | NA                                  | NA                                    | NA                               | NA                             | NA                                               | 4  | 0.070734 | 9.458532 | 5.135829 | 0.010107 |
| 0.205997    | 3.04906                        | NA                        | NA                         | -13.0642                | NA                    | NA                                  | NA                                    | 51.7155                          | NA                             | NA                                               | 5  | 1.519754 | 9.460492 | 5.137789 | 0.010097 |
| 0.869944    | -9.71551                       | 10.59306                  | NA                         | NA                      | NA                    | NA                                  | -176.897                              | NA                               | NA                             | NA                                               | 5  | 1.488807 | 9.522387 | 5.199684 | 0.00979  |
| 0.124578    | 3.216873                       | NA                        | NA                         | NA                      | NA                    | 0.000216                            | NA                                    | NA                               | NA                             | NA                                               | 4  | -0.02968 | 9.659352 | 5.336649 | 0.009142 |
| 1.019356    | -12.8443                       | 11.72639                  | NA                         | -10.6864                | NA                    | NA                                  | -220.504                              | NA                               | NA                             | NA                                               | 6  | 2.926409 | 9.799357 | 5.476654 | 0.008524 |

|          |          |          |          |          |          |          |          |          |          |          |   |          |          |          |          |
|----------|----------|----------|----------|----------|----------|----------|----------|----------|----------|----------|---|----------|----------|----------|----------|
| 0.016575 | 3.179572 | 0.597697 | -0.06685 | NA       | 0.014186 | NA       | NA       | NA       | NA       | NA       | 6 | 2.841966 | 9.968242 | 5.645538 | 0.007833 |
| 0.480525 | 3.141376 | NA       | -0.70999 | -6.70963 | -0.013   | NA       | NA       | NA       | 0.038939 | NA       | 7 | 4.526124 | 10.03866 | 5.715957 | 0.007562 |
| 0.17657  | NA       | NA       | NA       | NA       | 0.021848 | -0.00712 | NA       | NA       | NA       | NA       | 4 | -0.32767 | 10.25534 | 5.932636 | 0.006786 |
| 0.099095 | NA       | NA       | NA       | NA       | 0.015449 | NA       | NA       | NA       | NA       | NA       | 3 | -1.77902 | 10.48111 | 6.158405 | 0.006062 |
| 0.106005 | 2.390107 | NA       | -0.10918 | -15.3521 | 0.014372 | NA       | NA       | 117.6874 | NA       | NA       | 7 | 4.271144 | 10.54862 | 6.225917 | 0.00586  |
| 0.505909 | 2.809537 | NA       | -0.76092 | NA       | -0.01227 | -0.00347 | NA       | NA       | 0.044268 | NA       | 7 | 4.210611 | 10.66969 | 6.346984 | 0.005516 |
| 0.485027 | -5.29271 | 6.854359 | NA       | NA       | 0.017175 | -0.00468 | -112.418 | NA       | NA       | NA       | 7 | 4.19622  | 10.69847 | 6.375766 | 0.005437 |
| -0.02081 | 2.5099   | -0.35976 | NA       | -15.3817 | 0.015009 | NA       | NA       | 113.3678 | NA       | NA       | 7 | 4.067122 | 10.95667 | 6.633962 | 0.004779 |
| 0.286375 | 3.31908  | 1.767863 | NA       | NA       | NA       | -0.00165 | NA       | NA       | NA       | NA       | 5 | 0.742944 | 11.01411 | 6.691409 | 0.004643 |
| 0.282263 | 3.307259 | 1.501268 | -0.0673  | NA       | 5 | 0.723881 | 11.05224 | 6.729534 | 0.004556 |
| 0.041493 | 3.222339 | -0.35477 | -0.10381 | -9.13992 | 0.014082 | NA       | NA       | NA       | NA       | NA       | 7 | 3.999378 | 11.09215 | 6.76945  | 0.004466 |
| 0.636947 | -8.38183 | 8.015257 | NA       | -10.2891 | 0.016824 | -0.00461 | -155.521 | NA       | NA       | NA       | 8 | 5.799921 | 11.2573  | 6.934598 | 0.004112 |
| 0.162023 | 3.015846 | 1.1865   | NA       | NA       | 0.01334  | -0.00806 | NA       | NA       | NA       | 0.000151 | 7 | 3.869795 | 11.35132 | 7.028616 | 0.003923 |
| 0.122123 | 2.937009 | 1.12427  | -0.04324 | NA       | 0.018275 | -0.00552 | NA       | NA       | NA       | NA       | 7 | 3.855681 | 11.37955 | 7.056844 | 0.003868 |
| 0.264298 | NA       | NA       | NA       | -8.01829 | 0.021238 | -0.0081  | NA       | NA       | NA       | NA       | 5 | 0.557996 | 11.38401 | 7.061305 | 0.003859 |
| 0.563398 | 3.024675 | 0.251883 | -0.87971 | NA       | -0.02059 | NA       | NA       | NA       | 0.051133 | NA       | 7 | 3.803239 | 11.48443 | 7.161729 | 0.00367  |
| 0.925182 | -13.4636 | 10.94099 | -0.16241 | -11.4977 | 0.013093 | NA       | -224.695 | NA       | NA       | NA       | 8 | 5.584075 | 11.68899 | 7.36629  | 0.003314 |
| 0.677579 | -9.40138 | 9.294035 | -0.10382 | NA       | 0.013461 | NA       | -169.304 | NA       | NA       | NA       | 7 | 3.698443 | 11.69402 | 7.37132  | 0.003305 |
| 0.179483 | 2.158911 | NA       | -0.09311 | -16.091  | 0.019065 | -0.0055  | NA       | 109.8371 | NA       | NA       | 8 | 5.450662 | 11.95582 | 7.633116 | 0.0029   |
| 0.046794 | 2.862575 | NA       | -0.04763 | NA       | 0.017093 | -0.0057  | NA       | NA       | NA       | 6.92E-05 | 7 | 3.491124 | 12.10866 | 7.785957 | 0.002686 |
| 0.38589  | 2.930608 | NA       | -0.45927 | -8.45006 | 0.001517 | -0.00486 | NA       | NA       | 0.023834 | NA       | 8 | 5.366737 | 12.12367 | 7.800966 | 0.002666 |
| 0.31564  | 2.84692  | NA       | -0.11902 | -14.0537 | NA       | NA       | NA       | 61.77684 | NA       | NA       | 6 | 1.759393 | 12.13339 | 7.810684 | 0.002653 |
| 0.305575 | 3.349712 | 0.527931 | -0.1048  | -9.27568 | NA       | NA       | NA       | NA       | NA       | NA       | 6 | 1.754761 | 12.14265 | 7.819949 | 0.002641 |
| 0.328256 | NA       | 2 | -3.85536 | 12.15516 | 7.832458 | 0.002625 |
| 0.315931 | 3.247781 | NA       | -0.1111  | -10.7416 | NA       | -0.00106 | NA       | NA       | NA       | NA       | 6 | 1.731176 | 12.18982 | 7.86712  | 0.00258  |
| 1.260949 | -15.0864 | 12.93332 | -0.16944 | -11.8688 | NA       | NA       | -248.129 | NA       | NA       | NA       | 7 | 3.437245 | 12.21642 | 7.893715 | 0.002545 |
| 0.287133 | 3.393271 | 0.891088 | NA       | -8.83941 | NA       | -0.00189 | NA       | NA       | NA       | NA       | 6 | 1.697382 | 12.25741 | 7.934707 | 0.002494 |
| 1.01487  | -10.9363 | 11.2895  | -0.10911 | NA       | NA       | NA       | -191.579 | NA       | NA       | NA       | 6 | 1.686283 | 12.27961 | 7.956905 | 0.002466 |
| 0.155537 | NA       | NA       | NA       | -5.8708  | 0.014359 | NA       | NA       | NA       | NA       | NA       | 4 | -1.34014 | 12.28029 | 7.957586 | 0.002465 |
| 0.106419 | 2.328238 | 0.148947 | NA       | -14.9806 | 0.019149 | -0.00574 | NA       | 100.2158 | NA       | NA       | 8 | 5.269759 | 12.31763 | 7.994922 | 0.00242  |
| 0.112898 | 2.33248  | NA       | NA       | -15.1954 | 0.017934 | -0.00629 | NA       | 99.7087  | NA       | 4.05E-05 | 8 | 5.267647 | 12.32185 | 7.999146 | 0.002415 |
| 0.193315 | 3.127477 | NA       | -0.08219 | NA       | NA       | 0.000314 | NA       | NA       | NA       | NA       | 5 | 0.074462 | 12.35108 | 8.028374 | 0.00238  |
| 0.234927 | NA       | NA       | -0.16711 | NA       | 0.015285 | NA       | NA       | NA       | NA       | NA       | 4 | -1.37662 | 12.35325 | 8.030542 | 0.002377 |
| 0.678434 | -11.3322 | 9.256422 | NA       | -15.5593 | 0.013973 | NA       | -189.715 | 87.73679 | NA       | NA       | 8 | 5.221255 | 12.41463 | 8.09193  | 0.002305 |

|          |          |          |          |          |          |          |          |          |          |           |   |          |          |          |          |
|----------|----------|----------|----------|----------|----------|----------|----------|----------|----------|-----------|---|----------|----------|----------|----------|
| 0.235677 | 3.125493 | 0.615986 | NA       | -11.5639 | NA       | NA       | NA       | 47.61781 | NA       | NA        | 6 | 1.613783 | 12.42461 | 8.101904 | 0.002294 |
| 0.151117 | 2.973232 | 0.161744 | -0.08049 | -9.39789 | 0.018299 | -0.00569 | NA       | NA       | NA       | NA        | 8 | 5.170581 | 12.51598 | 8.193277 | 0.002191 |
| 0.235292 | 3.029276 | NA       | NA       | -13.1445 | NA       | -0.00105 | NA       | 46.9494  | NA       | NA        | 6 | 1.562984 | 12.52621 | 8.203504 | 0.00218  |
| 0.145272 | 2.967382 | NA       | -0.08139 | -9.67383 | 0.01796  | -0.00582 | NA       | NA       | NA       | 1.43E-05  | 8 | 5.164016 | 12.52911 | 8.206409 | 0.002177 |
| 0.279712 | NA       | NA       | -0.1317  | NA       | 0.021396 | -0.00676 | NA       | NA       | NA       | NA        | 5 | -0.05746 | 12.61491 | 8.292207 | 0.002086 |
| 0.874594 | -9.39171 | 10.43552 | NA       | NA       | NA       | -0.0006  | -172.185 | NA       | NA       | NA        | 6 | 1.500785 | 12.6506  | 8.327902 | 0.002049 |
| 0.141033 | 3.080015 | 0.29341  | NA       | -8.88734 | 0.014842 | -0.00762 | NA       | NA       | NA       | 0.000108  | 8 | 5.063336 | 12.73047 | 8.407769 | 0.001969 |
| 0.257771 | NA       | 0.777998 | NA       | NA       | 0.021123 | -0.0078  | NA       | NA       | NA       | NA        | 5 | -0.18746 | 12.87491 | 8.55221  | 0.001831 |
| 0.909325 | NA       | NA       | -1.12966 | NA       | -0.02692 | NA       | NA       | NA       | 0.061015 | NA        | 5 | -0.29217 | 13.08434 | 8.761636 | 0.001649 |
| 0.171391 | NA       | NA       | NA       | NA       | 0.022201 | -0.00695 | NA       | NA       | NA       | -1.07E-05 | 5 | -0.32747 | 13.15494 | 8.83224  | 0.001592 |
| 0.096502 | NA       | -0.02732 | NA       | NA       | 0.015496 | NA       | NA       | NA       | NA       | NA        | 4 | -1.77884 | 13.15769 | 8.834984 | 0.00159  |
| 1.024143 | -12.5138 | 11.56547 | NA       | -10.6886 | NA       | -0.00061 | -215.692 | NA       | NA       | NA        | 7 | 2.940203 | 13.2105  | 8.887799 | 0.001548 |
| 1.021141 | -12.8764 | 11.62087 | NA       | -12.0724 | NA       | NA       | -218.644 | 23.31049 | NA       | NA        | 7 | 2.9377   | 13.21551 | 8.892807 | 0.001545 |
| 0.381786 | NA       | NA       | NA       | -7.80368 | NA       | NA       | NA       | NA       | NA       | NA        | 3 | -3.15688 | 13.23684 | 8.914133 | 0.001528 |
| 0.473877 | 2.462634 | NA       | -0.65787 | -12.3674 | -0.00975 | NA       | NA       | 93.70804 | 0.035089 | NA        | 8 | 4.720404 | 13.41633 | 9.093631 | 0.001397 |
| 0.462694 | 3.094316 | -0.45737 | -0.72995 | -7.54195 | -0.01296 | NA       | NA       | NA       | 0.039793 | NA        | 8 | 4.582975 | 13.69119 | 9.36849  | 0.001218 |
| 0.39506  | NA       | NA       | -0.15888 | -8.59778 | 0.020648 | -0.00774 | NA       | NA       | NA       | NA        | 6 | 0.972291 | 13.70759 | 9.384889 | 0.001208 |
| 1.120542 | -8.40195 | 8.186649 | -0.84812 | NA       | -0.01846 | NA       | -153.938 | NA       | 0.047031 | NA        | 8 | 4.54885  | 13.75944 | 9.43674  | 0.001177 |
| 0.469506 | NA       | NA       | -0.17694 | NA        | 3 | -3.46241 | 13.8479  | 9.525194 | 0.001126 |
| 0.332794 | 3.250177 | 1.71962  | -0.06078 | NA       | NA       | -0.00153 | NA       | NA       | NA       | NA        | 6 | 0.802229 | 14.04772 | 9.725012 | 0.001019 |
| 0.319636 | NA       | NA       | -0.19222 | -6.68831 | 0.014019 | NA       | NA       | NA       | NA       | NA        | 5 | -0.7982  | 14.0964  | 9.773698 | 0.000994 |
| 0.50736  | 2.877315 | 0.742735 | -0.65786 | NA       | -0.00873 | -0.00423 | NA       | NA       | 0.038317 | NA        | 8 | 4.367064 | 14.12301 | 9.800312 | 0.000981 |
| 0.079239 | 2.292009 | -0.49574 | -0.11687 | -16.6919 | 0.015086 | NA       | NA       | 124.4541 | NA       | NA        | 8 | 4.336121 | 14.1849  | 9.862198 | 0.000951 |
| 0.393236 | NA       | 0.935131 | NA        | 3 | -3.6581  | 14.23928 | 9.916572 | 0.000926 |
| 0.589759 | -6.32658 | 7.45378  | -0.07547 | NA       | 0.016898 | -0.00438 | -125.333 | NA       | NA       | NA        | 8 | 4.306189 | 14.24476 | 9.922062 | 0.000923 |
| 0.598148 | -5.64047 | 7.16055  | NA       | NA       | 0.010694 | -0.00775 | -117.686 | NA       | NA       | 0.000193  | 8 | 4.281057 | 14.29503 | 9.972325 | 0.0009   |
